# Supplementary material for: Investigation of Plasma Metabolic and Lipidomic Characteristics of a Chinese Cohort and a Pilot Study of Renal Cell Carcinoma Biomarker
Source: Front Oncol. 2020 Aug 18;10:1507. doi: 10.3389/fonc.2020.01507 (PMC7461914; doi:10.3389/fonc.2020.01507)
Supplement: Supplementary file 3 [file Data_Sheet_3.xlsx]

## Sheet: Supplementary table legends
Supplemental tables
Table S1 Differential metabolites between male and female
Table S2 Differential lipids between male and female
TableS3 Biological function of gender and age-dependent metabolites and lipids
Table S4 Differential metabolites with age for females
Table S5 Differential metabolites with age for males
Table S6 Differential lipids with age for females
Table S7 Differential lipids with age for males

## Sheet: TableS1
Table S1 Differential metabolites between male and female
Variables	Compound ID	Description	Score	VIP	P value	Fold change (F/M)
4.49_312.2079n	HMDB13202	6-Keto-decanoylcarnitine	48	3.08781	7.8171e-15	0.587671
3.87_206.0442m/z	HMDB59765	3-Indolehydracrylic acid	42.9	1.55801	1.9984e-05	0.808903
4.49_568.3387n	HMDB02596	Deoxycholic acid 3-glucuronide	38.3	2.2528	3.1267e-09	0.30013
4.06_246.1695m/z	HMDB13132	Hydroxyvalerylcarnitine	42.2	2.67279	2.6136e-22	0.670783
4.66_332.2424m/z	HMDB61636	3-hydroxydecanoyl carnitine	41.6	1.19587	0.00018474	0.79049
4.99_316.2472m/z	HMDB00651	Decanoylcarnitine	41.7	1.45597	6.3053e-07	0.795995
4.44_361.1384m/z	HMDB02825	Theobromine	40.2	1.29396	6.9967e-05	0.825315
4.94_202.1432m/z	HMDB00832	Capryloylglycine	37.9	1.07839	0.00062894	0.842473
5.10_330.2628m/z	HMDB10221	9,10-DiHODE	40.8	1.47076	8.7348e-11	0.595468
3.84_247.1282m/z	HMDB11172	L-gamma-glutamyl-L-valine	41.2	1.70466	2.0065e-07	0.769999
5.17_366.2627m/z	HMDB06762	17a,21-Dihydroxypreg-nenolone	40.4	1.29424	0.00041594	0.732268
5.02_413.3036m/z	HMDB13335	3-Hydroxyhexadecadienoylcarnitine	40.8	1.15932	0.00032607	0.580834
3.94_281.1123m/z	HMDB01107	7-Methylguanosine	40.2	1.1503	0.00012692	0.848793
4.61_310.2006m/z	HMDB00791	L-Octanoylcarnitine	40.7	1.16079	0.00053453	0.722662
3.60_262.1642m/z	HMDB62555	hydroxyisovaleroyl carnitine	40.4	1.47572	6.9382e-07	0.807796
4.80_302.2318m/z	HMDB13288	Nonanoylcarnitine	40.4	2.34065	6.3979e-11	0.60347
5.94_302.3047m/z	HMDB00269	Sphinganine	40.3	1.41318	0.028998	1.09384
4.71_271.2049m/z	HMDB60512	Sterol	38.9	1.2963	1.3585e-07	0.841903
5.42_368.2784m/z	HMDB05972	Tetrahydrodeoxycortisol	36.7	1.46187	0.00074784	0.745583
4.99_384.2732m/z	HMDB13332	3-Hydroxy-5, 8-tetradecadiencarnitine	38.5	2.10627	1.8086e-06	0.702757
5.04_257.2254m/z	HMDB05935	Androstenol	38.6	2.53956	1.1123e-17	0.710275
2.48_176.0945n	HMDB01046	Cotinine	36.6	6.99408	1.084e-15	0.0201794
4.30_304.2110m/z	HMDB61634	3-hydroxyoctanoyl carnitine	36.3	1.29828	6.0458e-06	0.775723
4.94_360.2733m/z	HMDB13164	2-Hydroxylauroylcarnitine	38.3	1.23178	0.0013348	0.779738
5.12_186.0181m/z	HMDB01890	Acetylcysteine	37.6	1.05164	0.035126	0.851993
4.93_414.2993m/z	HMDB62325	1-hexadecyl-glycero-3-phosphate	37.9	1.97194	2.2678e-06	0.692289
5.03_430.3149m/z	HMDB00712	Hexadecanedioic acid mono-L-carnitine ester	38.4	2.54545	2.5501e-12	0.595931

## Sheet: TableS2
Table S2 Differential lipids between male and female
Varibles	Compound ID	Description	Score	VIP	P-value	Fold change (M/F)
10.86_313.2721m/z	4266222	MG(16:0)	40.5	1.23118	0.0099087	1.19352
11.24_594.5188n	4266234	DG(34:1)	45.9	1.09853	0.041257	1.13862
9.47_603.5310m/z	4266240	DG(O-34:1)	44.9	1.401	0.0010481	0.888052
5.34_530.3209m/z	4266273	PC(17:1)	41.8	1.10442	0.015585	1.99415
8.42_646.5012n	4266355	SM(d30:1)	49.8	3.48875	3.0152e-14	0.6462
6.02_672.5217m/z	7850635	Cer(d42:1)	52	1.05551	0.019611	0.851975
10.28_782.6248n	7850655	SM(d38:0)	45	2.13405	3.0782e-09	0.80948
2.33_481.3741n	7851449	3alpha,7alpha,12alpha-Trihydroxy-24-methyl-5beta-Cholestan-26-oic acid	39.6	2.52436	4.206e-07	2.22641
5.44_505.4224m/z	7982187	10Z,12E-hexadecadienoic acid	41.9	1.65301	0.0028968	1.21109
8.02_561.4845m/z	7982224	14Z,17-octadecadienoic acid	48.3	1.46703	0.01245	1.14991
2.71_403.3548m/z	7982340	19Z-pentacosenoic acid	41	3.35762	0.00011476	4.18191
6.06_391.3553m/z	7982775	17-oxo-20Z-hexacosenoic acid	39.9	1.60996	0.0023958	1.19261
1.51_142.1219m/z	7982841	3-amino-octanoic acid	41.7	1.54121	5.1839e-07	1.15231
9.14_678.5031m/z	7982877	PC(28:0)	38.2	1.58927	0.04358	0.743587
10.15_804.5844m/z	7983206	PC(39:5)	37.4	1.66143	0.022125	0.67637
9.93_720.5490m/z	7983483	PC(31:0)	35.7	1.28142	0.0046049	0.812898
9.74_805.5577n	7983602	PC(38:6)	41.2	1.43859	2.3202e-08	0.885344
9.69_705.5262n	7983745	PC(30:0)	39.5	1.68316	0.004288	0.814571
10.17_742.5703m/z	7983896	PC(P-34:2)	50.7	1.16483	0.00027304	0.897337
8.98_575.5000m/z	14710879	DG(34:2)	43.2	1.28261	0.040029	0.902484
10.96_606.5181n	14710886	DG(35:2)	45.5	1.933	0.004436	1.44938
11.31_643.5234m/z	14710901	DG(36:2)	39.3	1.22519	0.0079788	1.14306
9.14_601.5158m/z	14710914	DG(36:3)	47	1.55314	0.0022076	0.858106
11.40_646.5498n	14710951	DG(38:3)	39.1	1.61096	0.00010905	1.24531
11.14_662.5681m/z	14710963	DG(38:4)	38.4	1.32894	0.0056377	1.21681
9.02_625.5153m/z	14710974	DG(38:5)	45.1	1.44356	0.0049072	0.878035
8.85_623.4999m/z	14711014	DG(38:6)	38.3	2.60851	2.0336e-05	0.772436
9.34_651.5308m/z	14711068	DG(40:6)	44.4	2.3085	5.2499e-05	0.789302
9.45_719.5651m/z	14711153	DG(44:9)	37.5	1.41476	0.00023081	0.888058
11.21_670.5504n	14713839	PC(O-32:0)	40.8	1.43786	0.019656	1.21578
4.59_504.3422m/z	14713947	PC(O-16:0)	41.7	1.09347	0.011926	1.14231
3.51_546.3181m/z	14714062	PE(20:0)	38.1	1.44307	0.0036278	1.20308
5.94_464.3110m/z	14714338	PE(18:0)	39.3	1.11297	0.01131	1.08201
1.59_330.2624m/z	24701224	9,10-DiHODE	41.6	3.7282	4.3781e-10	2.16093
6.08_588.4336n	24701233	10-oxo-11-phytoenoic acid	43.7	1.27461	0.029895	1.20002
8.79_719.5656m/z	24702215	22:6 Cholesteryl ester	48.6	1.28346	0.0028319	0.910093
11.59_264.2671m/z	49703514	Oleamide	47.7	2.93875	0.013465	0.993717
8.15_564.3936n	49703547	PC(O-20:2)	36.3	1.90827	0.00086865	0.820417
9.11_674.5331n	49703630	SM(d32:1)	54.1	1.92346	1.3075e-08	0.831018
5.49_501.3910m/z	49703713	24-Hydroxygeminivitamin D3	39.1	2.38789	0.00020271	1.51327
3.63_426.3470m/z	49703759	3-Deoxy-3-azido-25-hydroxyvitamin D3	38.7	1.87694	3.6677e-06	1.18065
10.11_817.5931n	74380413	PC(P-40:6)	42.3	1.56982	2.8604e-07	0.849025
8.55_620.3000n	74380469	PI(20:4)	44.7	1.7889	0.00036621	0.827632
10.93_900.6787m/z	85297414	LacCer(d38:1)	53.7	2.20696	9.6961e-06	0.783328
10.86_825.6762m/z	123060161	28:6(10Z,13Z,16Z,19Z,22Z,25Z)	47.3	1.55248	2.5603e-06	0.846006
2.79_384.3090m/z	123060523	N-oleoyl threonine	38	2.73574	0.038542	5.0536
9.78_731.5422n	123060813	PC(32:1)	39.5	1.31267	0.0022293	0.898437
9.25_703.5111n	123060883	PC(30:1)	38.9	2.21794	0.0097489	0.777076
9.52_718.5340m/z	123061044	PC(31:1)	41.3	1.47547	0.0053132	0.779555
9.40_729.5270n	123061123	PC(32:2)	40.1	1.80086	0.00015448	0.835963
9.83_858.5949m/z	123061232	PC(40:5)	53.4	1.66474	0.00043586	0.773631
9.52_778.5309m/z	123061387	PC(36:6)	42.9	1.46132	1.5732e-06	0.86074
9.34_803.5418n	123061391	PC(38:7)	46.4	1.91533	2.7873e-09	0.803892
9.97_820.5793m/z	123061392	PC(39:6)	37.4	1.31232	0.00076458	0.867414
10.21_833.5855n	123061395	PC(40:6)	42.4	1.55381	8.2759e-07	0.87055
10.43_848.6116m/z	123061401	PC(41:6)	35.6	2.28858	0.00074457	0.714471
11.40_857.6272n	123061409	PC(43:6)	46.1	2.45554	2.9516e-05	0.720461
11.03_874.6628m/z	123061482	PC(O-42:4)	47	1.19769	0.00097103	0.873399
9.14_821.5524n	123061542	PC(P-40:4)	42.6	1.03024	0.016567	0.842386
5.13_572.3676m/z	123061577	PC(22:4)	42.2	1.38823	0.0091015	1.15556
4.54_545.3438n	123061586	PC(20:3)	46.9	1.19494	0.019218	1.1009
8.58_735.5609m/z	123061686	PE(34:1)	37.2	1.67979	0.0087959	0.840498
9.33_742.5346m/z	123061695	PE(36:3)	39.8	1.98548	7.3756e-06	0.768412
10.28_792.5501m/z	123061783	PE(38:3)	43.2	1.59803	0.0023388	0.770216
9.64_743.5419n	123061853	PE(36:2)	47.2	1.61653	2.4091e-06	0.856817
10.67_772.6188m/z	123061878	PE(39:0)	40.2	1.425	2.5218e-08	0.877907
10.89_804.5849m/z	123062233	PE(42:5)	46.8	1.51185	5.8683e-05	0.813851
11.21_868.6745m/z	123062258	PE(43:0)	50.6	1.42935	0.042107	0.846876
9.98_716.5179m/z	123062317	PE(34:2)	46.1	1.21319	0.018089	0.869267
10.67_864.6419m/z	123062342	PE(43:2)	48.8	1.40546	0.0055467	0.880834
10.55_802.5701m/z	123062396	PE(42:6)	45.5	1.59407	0.025629	0.611029
8.78_700.5665m/z	123062520	PE(O-35:1)	45.6	2.57052	1.5769e-05	0.695148
8.98_716.5427n	123062587	PE(O-34:3)	43.1	1.81153	2.3422e-07	0.851756
8.59_796.5197m/z	123062593	PE(P-40:7)	39.4	1.19493	0.0053752	0.861648
8.85_691.5345m/z	123062624	PE(P-32:1)	44.6	2.19021	3.2487e-08	0.771697
3.83_547.3456m/z	123062687	PE(22:4)	39.7	1.56735	0.0012483	1.10996
9.47_814.6019m/z	123062938	PS(39:1)	36.2	1.8555	1.7054e-05	0.822315
9.50_812.5383m/z	123063109	PS(38:4)	37.5	1.57298	0.0022076	1.17232
9.50_838.6018m/z	123063279	PS(41:3)	44.8	1.50258	0.013493	0.861915
8.75_701.4956n	123063669	PS(O-32:1)	40.4	1.83913	0.0064468	0.65821
10.00_746.5649m/z	123063724	PS(O-35:0)	41.7	1.03274	0.0020866	0.903186
10.36_786.5963m/z	123063765	PS(P-38:0)	48.9	1.05414	0.00020147	0.929215
10.76_814.6273m/z	123063816	PS(P-40:0)	39	1.21965	0.0005318	0.905295
9.01_728.5184m/z	123063829	PS(P-34:1)	39.5	1.78036	0.0019	0.757824
1.60_536.3315m/z	123063839	PS(20:0)	41.2	1.45241	0.012173	0.840628
2.15_540.3630m/z	123063861	PS(O-20:0)	40	1.58528	3.2932e-06	0.791711
9.11_755.4785m/z	123064477	PG(35:5)	36.4	1.40824	0.00032032	1.01235
8.98_834.5209n	123065053	PI(34:2)	38.9	1.40724	0.0015119	0.880403
9.04_902.5703m/z	123065432	PI(38:5)	47.7	1.64948	0.00020088	0.845338
9.38_910.5519n	123065440	PI(40:6)	38	2.25762	3.1387e-06	0.767963
8.85_900.5552m/z	123065834	PI(38:6)	37.1	2.58125	2.3857e-06	0.758038
8.95_858.5209n	123065875	PI(36:4)	37.2	1.30084	0.0030217	0.890265
5.04_644.3742m/z	123066181	PI(20:1)	47.9	1.20564	0.011359	0.846781
10.50_797.6454m/z	123066911	PA(44:1)	52	1.64863	9.9321e-08	0.85111
5.28_604.4406n	123067146	PA(O-30:1)	36.8	1.34869	0.037889	0.85524
7.96_580.4433n	123067239	PA(P-30:1)	37.8	2.97879	4.3556e-07	1.41546
11.31_659.4972m/z	123067270	PA(P-34:1)	38.2	1.57471	0.001725	1.24057
10.54_746.6028m/z	123067309	PA(P-39:1)	48.2	1.38299	8.5001e-06	0.903379
3.24_434.2411n	123067332	PA(18:2)	39.8	1.05759	0.00039822	0.863474
9.80_764.5188m/z	123067365	PE(38:4)	51.6	1.84965	1.5723e-05	0.747387
10.00_765.5272n	123067374	PE(P-38:5)	38.9	1.23253	0.0051389	0.815281
10.17_774.5383m/z	123067380	PE(P-40:6)	45.7	1.01145	0.015868	0.871299
11.56_608.5942m/z	123068726	Cer(d16:1/23:0)	46.9	1.49681	0.010725	0.850944
11.81_635.6180n	123068730	Cer(d18:1/23:0)	38.8	1.4198	0.0089135	0.856788
12.10_633.6383n	123068739	Cer(d18:2/23:0)	37.7	1.16652	0.010426	1.22065
8.55_672.5168n	123068745	SM(d18:2/14:0)	50.6	3.47418	7.397e-25	0.685617
8.92_687.5395m/z	123068747	SM(d18:2/15:0)	43.3	2.38869	9.3783e-13	0.764503
9.41_689.5556m/z	123068748	SM(d16:1/17:0)	49.6	1.53245	2.8604e-07	0.853978
9.78_728.5794n	123068761	SM(d18:2/18:0)	42.7	1.2426	1.2758e-05	0.898665
9.57_745.5795m/z	123068767	SM(d19:1/18:0)	38.5	2.11879	0.00062376	0.721289
10.26_757.6171m/z	123068771	SM(d18:2/20:0)	42.5	1.43307	4.0903e-08	0.89125
10.85_773.6472m/z	123068776	SM(d16:1/23:0)	39.2	1.25429	1.0733e-06	0.849008
10.11_807.6319m/z	123068782	SM(d16:1/24:1)	45.5	2.03164	1.4187e-05	0.791438
10.53_827.6582m/z	123068794	SM(d18:2/25:0)	39.5	2.61278	2.9516e-05	0.671681
2.82_423.3279m/z	126522576	15-HETE-GABA	45.4	1.41688	0.002352	1.14643
6.14_314.2443n	135636061	10R-HpOME(11Z)	43.2	1.22127	0.010426	1.1263
1.51_328.2468m/z	135636210	7S,8S-DiHOTrE	41.9	1.83807	0.0044276	0.791858
6.39_545.4148m/z	135638093	DG(39:2)	38.9	1.65866	0.0028274	1.22521
6.39_547.4318m/z	135638114	DG(29:1)	39.5	2.15995	0.035579	1.21236
6.08_612.4335n	135638128	DG(33:5)	39.5	1.78916	0.025624	1.26689
5.25_566.4751m/z	135638165	DG(31:3)	37.9	1.41466	0.005041	1.2659
6.09_559.4689m/z	135638193	DG(33:3)	47.5	1.4777	0.0053803	1.18632
7.45_573.4460m/z	135638209	DG(31:1)	38.8	2.20643	0.00055409	1.35573
6.39_572.4393n	135638210	DG(31:2)	44.2	2.01315	0.0043541	1.30765
6.40_601.4769m/z	135638215	DG(33:2)	46.9	2.31312	0.0013472	1.43542
6.39_614.4489n	135638217	DG(33:4)	44.1	1.69047	0.022468	1.20347
7.45_598.4540n	135638261	DG(35:6)	37.9	2.38355	0.0012293	1.29174
9.35_753.5264n	160779914	PC(34:4)	44.1	1.36924	0.00089156	0.859863
10.23_860.6104m/z	160779918	PC(40:4)	43.9	2.50724	7.0039e-05	0.755529
10.44_817.5924n	160779951	PC(O-38:4)	48.6	1.40371	1.3795e-05	0.837021
11.38_902.6950m/z	160779980	PC(O-44:4)	46.7	1.97937	3.6772e-05	0.802145
10.08_716.5540m/z	160779987	PC(P-32:1)	39.6	1.90346	1.309e-06	0.814892
10.15_717.5631n	160780009	PC(16:0/P-16:0)	40.6	1.81055	2.3202e-08	0.785063
10.67_846.6598m/z	160780060	PC(22:2/P-18:1)	45.2	1.39892	9.5381e-05	0.891172
11.34_578.5839m/z	160780152	Cer(d20:0/18:0)	44	1.55884	0.0031835	1.33148
8.76_661.5240m/z	160780195	PE-Cer(d14:1(4E)/20:0)	46.5	2.84153	4.5583e-13	0.717178
9.44_753.5862m/z	160780203	PE-Cer(d14:1(4E)/25:0)	50.2	1.61201	0.00024282	0.768277
7.79_645.4930m/z	160780233	PE-Cer(d15:2(4E,6E)/18:0)	38.8	3.66725	3.7508e-10	0.578468
9.50_715.5703m/z	160780254	PE-Cer(d14:1(4E)/24:0(2OH))	45.4	1.25538	5.1278e-05	0.902715
10.72_755.5727m/z	160780274	PE-Cer(d16:1(4E)/22:0(2OH))	40.3	1.21827	0.0057936	0.828439
10.04_743.6006m/z	160780276	PE-Cer(d16:1(4E)/24:0(2OH))	49.6	1.98694	3.6362e-10	0.808548
11.65_605.6073n	173737519	Cer(m18:1(4E)/22:0)	43.8	1.23994	0.0076398	1.19788
4.85_476.3712m/z	LMFA07070010	(11Z)-eicoseneoylcarnitine	37.9	2.26111	1.7179e-06	1.33161
1.54_340.2468m/z	LMFA07070024	(9Z)-3-hydroxydodecenoylcarnitine	44.1	2.05784	1.3456e-05	1.27899
3.63_424.3403m/z	LMFA07070025	(9Z)-3-hydroxyoctadecenoylcarnitine	52.6	1.69218	2.3978e-05	1.15851
1.65_342.2624m/z	LMFA07070032	2-Hydroxylauroylcarnitine	46.4	1.06834	0.010168	1.44878
2.15_388.3041m/z	LMFA07070033	2-Hydroxymyristoylcarnitine	38.8	1.81063	0.00075448	1.19668
2.65_431.3495m/z	LMFA07070044	3-hydroxypalmitoleoylcarnitine	43.7	2.58225	1.0841e-06	1.44481
5.97_428.3713m/z	LMFA07070051	Acylcarnitine C18:0	46.4	1.59293	0.00019097	1.15259
5.17_414.3561m/z	LMFA07070067	Heptadecanoyl carnitine	39.1	1.76076	0.0030975	1.22649
1.57_384.2727m/z	LMFA07070084	O-(13-carboxytridecanoyl)carnitine	40.2	1.59136	0.00012719	1.28831
2.81_473.3597m/z	LMFA07070086	O-[(9Z)-17-carboxyheptadec-9-enoyl]carnitine	41.9	2.47044	0.041151	2.54038
2.81_446.3244m/z	LMFA07070092	O-linoleoylcarnitine	38.5	1.48254	0.037977	1.1892
4.38_400.3404m/z	LMFA07070098	O-palmitoylcarnitine	51.4	1.05992	0.0087562	1.08216
3.83_543.3298n	LMGP01050140	LysoPC(20:4)	49.9	1.44467	0.0027497	1.0992
2.87_570.3182m/z	LMGP01050143	LysoPC(22:5)	48.3	1.32583	0.0018512	1.21041
8.40_606.4459m/z	LMGP01050144	LysoPC(24:1)	40.8	1.37277	0.043381	0.896577
1.60_550.2873m/z	LMGP02050059	LysoPE(22:5)	41.7	1.47978	0.0053803	0.501481
4.05_501.2830n	LMGP02050067	LysoPE(20:4)	49.1	1.04583	0.039205	1.08764
4.21_548.3590m/z	LMGP02050071	LysoPE(24:0)	41.3	1.29053	0.019878	1.13785

## Sheet: Table3
TableS3 Biological function of gender and age-dependent metabolites and lipids.
Class	Metabolites Name	Biological Function	References
Gender-dependent metabolites
Acylcarnitine	Decanoylcarnitine	Energy production, fatty acid metabolism	1
	Hexadecanedioic acid mono-L-carnitine ester
	L-Octanoylcarnitine
	Hydroxyvalerylcarnitine
	2-Hydroxylauroylcarnitine
	6-Keto-decanoylcarnitine
	Nonanoylcarnitine
	3-Hydroxy-5, 8-tetradecadiencarnitine
	3-Hydroxyhexadecadienoylcarnitine
	3-hydroxyoctanoyl carnitine
	3-hydroxydecanoyl carnitine
	Hydroxyisovaleroyl carnitine
Steroids	Androstenol	Positive modulators of GABAA receptors	2
	Tetrahydrodeoxycortisol	Influences mineralocorticoid and glucocorticoid metabolism,such effects may be of relevance to the development of low-renin essential hypertension	3
	17a,21-Dihydroxypreg-nenolone	An intermediate in alternative pathways in human adrenal steroidogenesis	4
	Sterol	Alter clathrin-dependent and clathrin-independent endocytosis	5
	Sphinganine	Blocker postlysosomal cholesterol transport	6
Acyl glycines	Capryloylglycine	Normally minor metabolites of fatty acids,could be used to diagnose disorders associated with mitochondrial fatty acid beta-oxidation	7
Nucleoside	7-Methylguanosine	Endogenous methylated nucleoside,a substrate for purine-nucleoside phosphorylase	8
Amino acid	Acetylcysteine	Precursor in the formation of the antioxidant glutathione, able to reduce free radicals
Bile acid	Deoxycholic acid 3-glucuronide	Emulsification of fats for the absorption in the intestin
Oxylipin	9,10-DiHODE	Be involved in the regulation of various biological processes such as inflammation, pain and blood coagulation	9
Age-dependent metabolites for female
Amino acid	Acetylcysteine	Precursor in the formation of the antioxidant glutathione, able to reduce free radicals
Acyl glycines	N-Decanoylglycine	Normally minor metabolites of fatty acids,could be used to diagnose disorders associated with mitochondrial fatty acid beta-oxidation
Acylcarnitine	6-Keto-decanoylcarnitine	Energy production, fatty acid metabolism	1
Fatty acid	12-Hydroxydodecanoic acid	The substrate of the human glutathione-dependent formaldehyde dehydrogenase	10
	5,8-Tetradecadienoic acid	An intermediate of unsaturated fatty acid oxidation. An increase of goshuyic acid in plasma is associated with acyl-CoA dehydrogenase deficiency disorders	11
	5-Acetylamino-6-formylamino-3-methyluracil	Participates in Caffeine metabolism
	Palmitic amide	Fatty acid amides ,lies in the competition with endocannabinoids for binding to the active site of the enzyme and thus in increasing the concentration of endocannabinoids	12
	12-Hydroxy arachidonic acid	A possible neuroprotective effect	13
Steroid	Tetrahydrocortisone	Influences mineralocorticoid and glucocorticoid metabolism,such effects may be of relevance to the development of low-renin essential hypertension	3
NAD metabolites	N1-Methyl-2-pyridone-5-carboxamide	Probably a consequence of both decreased renal excretion and increased production in the liver or other organs	14
	N1-methyl-4-pyridone-3-carboxamide
Age-dependent metabolites for male
Amino acid	Acetylcysteine	Precursor in the formation of the antioxidant glutathione, able to reduce free radicals
Acylcarnitine	2-Hydroxylauroylcarnitine	Energy production, fatty acid metabolism	1
	Undecanoylcarnitine
	Decanoylcarnitine
	L-Octanoylcarnitine
Bile acid	Glycocholic acid	Involved in the emulsification of fats. Glycocholic acid is found to be associated with alpha-1-antitrypsin deficiency	15
	3b-Hydroxy-5-cholenoic acid	A potential biomarker of the syndrome of hepatic ductular hypoplasia	16
Nucleoside	5-Methylthioadenosine	Influence the regulation of gene expression, proliferation, differentiation, and apoptosis.A potential biomarker of severe combined immunodeficiency syndrome	17
Fatty acid	11-Dodecenoic acid	Energy storage and production	9,10
	13S-hydroxyoctadecadienoic acid
	Linoleamide	Induce an increase in intracellular Ca2,sleep-inducing molecular	18
NAD metabolites	N1-Methyl-2-pyridone-5-carboxamide	Probably a consequence of both decreased renal excretion and increased production in the liver or other organs	14
Tryptamines	Serotonin	Act as a local transmitter at synapses in the nervous system, and as a paracrine or hormonal modulator of circuits upon diffusion,	19
References
1.Moder M, Kiessling A, Loster H. Current methods for determination of L-carnitine and acylcarnitines. Monatshefte Fur Chemie 2005;136:1279-91.
2.Kaminski, R.M., et al., The pheromone androstenol (5 alpha-androst-16-en-3 alpha-ol) is a neurosteroid positive modulator of GABAA receptors. J Pharmacol Exp Ther, 2006. 317(2): p. 694-703.
3.Kennon, B., et al., Aldosterone synthase gene variation and adrenocortical response to sodium status, angiotensin II and ACTH in normal male subjects. Clin Endocrinol (Oxf), 2004. 61(2): p. 174-81.
4.Kaufmann, S.H., K. Sinterhauf, and D. Lommer, Alternative pathways in human corticosteroid biosynthesis. J Steroid Biochem, 1980. 13(6): p. 599-605.
5.Kim, J.H., et al., The effect of sterol structure upon clathrin-mediated and clathrin-independent endocytosis. J Cell Sci, 2017. 130(16): p. 2682-2695.
6.Roff, C.F., et al., Type C Niemann-Pick disease: use of hydrophobic amines to study defective cholesterol transport. Dev Neurosci, 1991. 13(4-5): p. 315-9.
7.Rinaldo, P., et al., Stable isotope dilution analysis of n-hexanoylglycine, 3-phenylpropionylglycine and suberylglycine in human urine using chemical ionization gas chromatography/mass spectrometry selected ion monitoring. Biomed Environ Mass Spectrom, 1989. 18(7): p. 471-7.
8.Cho, S.H., et al., Direct determination of nucleosides in the urine of patients with breast cancer using column-switching liquid chromatography-tandem mass spectrometry. Biomed Chromatogr, 2006. 20(11): p. 1229-36.
9.Schuchardt, J.P., et al., Comparison of free serum oxylipin concentrations in hyper- vs. normolipidemic men. Prostaglandins Leukot Essent Fatty Acids, 2013. 89(1): p. 19-29.
10.Nguyen D, Samson SL, Reddy VT, Gonzalez EV, Sekhar RV. Impaired mitochondrial fatty acid oxidation and insulin resistance in aging: novel protective role of glutathione. Aging Cell 2013;12:415-25
11.Onkenhout, W., et al., Identification and quantification of intermediates of unsaturated fatty acid metabolism in plasma of patients with fatty acid oxidation disorders. Clin Chem, 1995. 41(10): p. 1467-74.
12.Carpenter, T., et al., Use of reversed phase HP liquid chromatography to assay conversion of N-acylglycines to primary fatty acid amides by peptidylglycine-alpha-amidating monooxygenase. J Chromatogr B Analyt Technol Biomed Life Sci, 2004. 809(1): p. 15-21.
13.Sun, L., et al., 12/15-Lipoxygenase metabolites of arachidonic acid activate PPARgamma: a possible neuroprotective effect in ischemic brain. J Lipid Res, 2015. 56(3): p. 502-14.
14.Slominska E, Rutkowski P, Smolenski RT, Szutowicz A, Rutkowski B, Swierczynski J. The age-related increase in N-methyl-2-pyridone-5-carboxamide (NAD catabolite) in human plasma. Molecular and Cellular Biochemistry 2004;267:25-30.
15.Trivedi, P., et al., Serum type III procollagen peptide as a non-invasive marker of liver damage during infancy and childhood in extrahepatic biliary atresia, idiopathic hepatitis of infancy and alpha 1 antitrypsin deficiency. Clin Chim Acta, 1986. 161(2): p. 137-46.
16.Hernanz, A., et al., Unusual serum bile acid pattern in children with the syndrome of hepatic ductular hypoplasia. Clin Chim Acta, 1985. 145(3): p. 289-96.
17.Mills, G.C. and J.S. Mills, Urinary excretion of methylthioadenosine in immunodeficient children. Clin Chim Acta, 1985. 147(1): p. 15-23
18.Huang, J.K. and C.R. Jan, Linoleamide, a brain lipid that induces sleep, increases cytosolic Ca2+ levels in MDCK renal tubular cells. Life Sci, 2001. 68(9): p. 997-1004.
19.Synaptic and extrasynaptic secretion of serotonin.

## Sheet: TableS4
Table S4 Differential metabolites with age for females
Variables	Compound ID	Description	Score	VIP	p value
1.80_199.1686m/z	HMDB02059	12-Hydroxydodecanoic acid	39.6	1.12593	2.0303e-07
3.54_229.1539m/z	HMDB11175	L-leucyl-L-proline	45.1	1.11026	1.6563e-05
3.61_259.0915m/z	HMDB11737	Gamma Glutamylglutamic acid	38.3	1.11465	6.0643e-07
3.85_303.1466m/z	HMDB28892	Histidinyl-Phenylalanine	40.3	1.0345	2.0014e-06
3.91_206.0700n	HMDB00375	3-(3-Hydroxyphenyl)propanoic acid	31.7	1.03165	0.00035738
3.97_190.0492m/z	HMDB00978	4-(2-Aminophenyl)-2,4-dioxobutanoic acid	40.9	1.19874	1.9114e-09
4.54_206.0806m/z	HMDB59765	3-Indolehydracrylic acid	44.6	1.08506	8.153e-06
4.56_299.1092m/z	HMDB34263	Triethyl citrate	38.9	1.68793	5.9286e-14
4.57_186.0907m/z	HMDB02096	3-Indolebutyric acid	37.8	1.00574	0.035326
4.71_275.0477m/z	HMDB28970	Methionyl-Cysteine	36.9	1.10854	0.0017039
4.84_229.1671n	HMDB13267	N-Decanoylglycine	40	1.20779	1.7884e-10
5.06_311.1125n	HMDB13202	6-Keto-decanoylcarnitine	43.7	1.18158	2.9765e-05
5.10_330.2628m/z	HMDB10221	9,10-DiHODE	44.4	1.28581	4.959e-06
5.12_186.0181m/z	HMDB01890	Acetylcysteine	36.3	1.14055	3.2357e-08
5.12_412.2836m/z	HMDB12530	11-Hydroxyeicosatetraenoate glyceryl ester	38.3	1.08556	1.0408e-05
5.16_414.2992m/z	HMDB62332	N-Docosahexaenoyl GABA	38.4	1.01366	0.0011903
5.19_346.2134n	HMDB00903	Tetrahydrocortisone	39.1	1.14535	0.027103
5.25_206.1664n	HMDB00560	5,8-Tetradecadienoic acid	42.2	1.06919	0.029944
5.64_267.1805n	HMDB29064	Threoninyl-Isoleucine	41.1	1.20612	1.5713e-11
5.65_250.1929n	HMDB00806	Myristic acid	38.1	2.04938	2.4656e-09
5.66_286.2137n	HMDB41287	16-Hydroxy-10-oxohexadecanoic acid	41.2	1.06372	1.6582e-05
5.75_372.2655n	HMDB13627	Cervonoyl ethanolamide	39.2	1.17573	0.00124
5.91_334.2346m/z	HMDB06254	4-Hydroxyretinoic acid	38.6	1.02732	7.8487e-06
5.94_302.3047m/z	HMDB00827	Stearic acid	38.5	1.0147	6.2333e-07
6.51_314.2449n	HMDB04705	12,13-DHOME	43.9	1.13969	0.022131
7.89_378.2972n	HMDB32662	(S)-9-Hydroxy-10-undecenoic acid	37.6	1.12429	9.4233e-08
8.24_209.0691m/z	HMDB11105	5-Acetylamino-6-formylamino-3-methyluracil	40.1	1.00222	1.9114e-09
9.15_255.2558n	HMDB12273	Palmitic amide	38.9	1.12095	1.4756e-09
9.75_338.3409m/z	HMDB60101	12 Hydroxy arachidonic acid	39.7	1.34865	7.2216e-10
9.97_284.2940m/z	HMDB34146	Octadecanamide	44.3	1.04948	3.7236e-06
3.91_157.0754m/z	HMDB29739	1H-Indole-3-acetamide	38.8	1.01261	1.4813e-06
4.51_152.0183n	HMDB04193	N1-Methyl-2-pyridone-5-carboxamide	39.6	1.34309	0.0059772

## Sheet: TableS5
Table S5 Differential metabolites with age for males
Variables	Compound ID	Description	Score	VIP	P-value
1.57_188.1274m/z	HMDB04231	Pantothenol	40.5	1.47363	7.5656e-06
2.48_176.0945n	HMDB00259	Serotonin	37.2	1.69153	0.00015559
3.71_118.0649m/z	HMDB10715	2-Phenylacetamide	44.4	1.08545	0.038304
4.23_187.1206n	HMDB29048	Serinyl-Serine	41.7	1.1733	0.001687
4.57_342.2634m/z	HMDB13164	2-Hydroxylauroylcarnitine	44.6	1.63507	1.4714e-09
4.61_310.2006m/z	HMDB37846	N-(1-Deoxy-1-fructosyl)phenylalanine	52.2	1.03351	0.0052086
4.63_221.1530m/z	HMDB32248	11-Dodecenoic acid	32.5	1.11797	0.043021
4.77_351.2365n	HMDB13321	Undecanoylcarnitine	35	1.60087	3.6406e-06
4.90_338.2316m/z	HMDB00651	Decanoylcarnitine	39.8	1.26832	1.7656e-06
5.00_159.5361n	HMDB01173	5'-Methylthioadenosine	38.4	1.30292	0.0059006
5.12_186.0181m/z	HMDB01890	Acetylcysteine	36.2	1.22183	8.0923e-06
5.12_465.3078n	HMDB00138	Glycocholic acid	38	1.70588	0.0041411
5.17_288.0853m/z	HMDB00791	L-Octanoylcarnitine	41.5	1.99594	9.5447e-09
5.30_194.0937n	HMDB59744	3,4-Methyleneazelaic acid	39.6	1.16776	0.0051865
5.33_386.2890m/z	HMDB05821	Beta-Cortol	38.6	1.61485	2.0337e-07
5.69_262.2522m/z	HMDB62656	Linoleamide	40.8	2.47231	3.81e-13
5.75_372.2655n	HMDB13627	Cervonoyl ethanolamide	39.2	1.05663	0.021434
5.93_303.2309m/z	HMDB10222	9-HETE	38.4	1.6081	0.0088428
6.24_339.2405n	HMDB00308	3b-Hydroxy-5-cholenoic acid	43.7	1.72559	2.5929e-07
6.51_314.2449n	HMDB04667	13S-hydroxyoctadecadienoic acid	39	1.47777	6.029e-08
7.69_431.3146m/z	HMDB60127	25-Hydroxyvitamin D3-26,23-lactol	46.4	1.1656	1.7841e-15
3.36_175.0472m/z	HMDB04193	N1-Methyl-2-pyridone-5-carboxamide	38.8	1.04636	0.02419

## Sheet: TableS6
Table S6 Differential lipids with age for females
Variables	Compound ID	Description	Score	VIP	P value
1.51_315.2398n	14710852	8E-Heptadecenedioic acid	44.1	1.03919	0.0091634
1.51_328.2468m/z	135636210	7S,8S-DiHOTrE	43.3	2.04422	0.0001178
1.60_550.2873m/z	LMGP02050059	LysoPE(22:5)	41.6	1.65477	1.4067e-14
1.89_474.2825m/z	123064999	PG(14:0)	41.1	1.1152	0.00095296
10.15_717.5631n	160780009	PC(16:0/P-16:0)	40.1	1.02031	0.00042461
10.15_750.5964m/z	85297421	GalCer(d18:1/18:0)	38.3	1.39504	0.017418
10.18_731.6022m/z	4266354	SM(d18:1/18:0)	49.4	1.04692	2.0547e-06
10.79_782.6452m/z	123068823	GlcCer(d18:2/22:0)	36.3	1.05061	5.6739e-05
10.85_829.6759m/z	123064986	PG(P-20:0/22:0)	42.4	1.03853	0.0069127
10.97_846.6302m/z	160779952	PC(O-40:4)	45.5	1.04105	0.0029466
11.09_787.6651m/z	123068784	SM(d16:1/24:0)	42.4	1.01385	1.6916e-07
11.31_800.6725n	123068788	SM(d17:1/24:0)	49.3	1.0828	7.1919e-07
11.58_778.5968m/z	123063739	PS(O-16:0/20:0)	36.7	1.5941	9.8655e-07
11.59_264.2671m/z	49703514	Oleamide	50.2	3.64924	2.8389e-06
11.59_621.6026n	7850626	Cer(d18:1/22:0)	46.4	1.09426	4.6064e-05
11.59_838.1784m/z	123061365	PC(40:4)	46.2	1.39608	6.5038e-08
11.61_679.4277m/z	123066813	PA(35:6)	40.7	1.29893	0.0093779
11.64_654.6120m/z	173737522	Cer(m18:1/24:1)	40.5	2.40284	0.0042266
11.65_605.6073n	173737519	Cer(m18:1/22:0)	48.2	1.39962	0.00024173
11.68_799.2443m/z	123068786	SM(d18:2/23:0)	46.8	1.00866	0.0041857
11.76_667.6441n	85297409	Cer(t18:0/24:0)	45.6	1.25271	0.00012936
12.05_649.6335n	7850635	Cer(d18:0/24:1)	53.6	1.14449	8.1526e-05
12.05_688.5963m/z	24702211	20:5 Cholesteryl ester	35.7	1.06786	0.003393
12.10_633.6383n	173737520	Cer(m18:1/24:0)	47.4	1.08657	0.0011402
12.10_698.5849n	14711100	DG(42:5）	37.9	1.21459	9.531e-07
12.18_663.6492n	14714478	Cer(d18:1/25:0)	38.2	1.12254	0.00090795
13.41_878.7317n	14711531	TG(54:6)	50.6	1.06011	0.00013498
14.88_834.7635n	4266248	TG(50:0)	49.7	1.26147	0.00070929
2.01_412.3039m/z	85291982	hexadecanedioic acid mono-L-carnitine ester	39.1	1.19814	1.2346e-05
2.04_342.2866n	24701311	5-Oxo-ETE-d7	37.9	1.57926	3.3444e-07
2.09_440.2750m/z	7983905	PC(12:0)	38.9	1.01081	1.936e-09
2.30_370.2936m/z	LMFA07070033	2-Hydroxymyristoylcarnitine	48.2	1.18355	0.00010873
2.43_485.3810m/z	7982560	14-hydroxy-5Z-tetradecenoic acid	40.4	1.39382	3.5423e-10
2.51_362.2678m/z	24701348	17-HDoHE	37.4	1.41053	0.0013784
2.52_413.3122n	LMFA07070044	3-hydroxypalmitoleoylcarnitine	46.6	1.24547	5.1225e-05
2.65_431.3495m/z	123060505	N-stearoyl glutamic acid	43.5	1.20118	0.041415
2.79_384.3090m/z	123060523	N-oleoyl threonine	37.6	2.78055	3.6132e-07
2.79_440.3351m/z	LMFA07070085	O-(17-carboxyheptadecanoyl)carnitine	43.1	1.22043	6.5754e-05
3.28_274.2728m/z	4266342	C16 Sphinganine	38.8	2.8674	1.7031e-07
3.60_640.3426m/z	123066183	PI(20:3)	42.9	1.76611	0.0087429
4.02_410.2421n	14714459	PA(16:0)	39.4	2.68842	0.0001588
4.10_480.3426m/z	123061590	PC(O-16:1)	37.1	1.28801	0.00095873
4.33_379.2825m/z	85292010	MG(20:4)	38.6	1.17032	0.0046615
4.85_476.3712m/z	LMFA07070010	(11Z)-eicoseneoylcarnitine	38.3	1.14228	0.0096986
4.87_527.2980n	123062694	PE(20:2)	51.4	1.00107	0.024849
4.90_541.4433m/z	7982640	(+)-12-hydroxy-9Z-hexadecenoic acid	37.7	1.48825	6.085e-06
5.25_566.4751m/z	135638121	DG(31:3)	38.7	1.41463	0.0018194
5.28_392.3114m/z	7850550	N,N-(2,2-dihydroxy-ethyl) arachidonoyl amine	43.2	1.18088	0.0013347
5.28_604.4406n	123067146	PA(O-30:1)	40.4	1.1376	0.00138
5.31_171.1372m/z	7982535	9-hydroxy-decanoic acid	35.2	1.06686	4.2628e-05
5.32_344.2602m/z	7850526	N-arachidonoyl glycine	40.8	1.4615	9.1591e-06
5.47_386.3378n	4266228	MG(20:0)	40.4	1.3096	0.00029703
5.49_501.3910m/z	49703713	(20R)-24-Hydroxygeminivitamin D3	42	1.15805	0.044482
5.93_597.4997m/z	135636165	19-HOME	41.5	1.21899	0.00054165
6.03_358.2758m/z	126522581	N-arachidonoyl alanine	38.2	1.06139	0.00057725
6.08_545.4148m/z	135638093	DG(39:2)	39.5	1.07001	0.0083218
6.08_653.5430m/z	135638275	DG(40:5)	35.2	1.03359	0.009899
6.36_566.4515n	135638113	DG(29:0)	38.1	1.64736	7.6393e-05
6.39_304.2360n	LMFA07070016	(2E,5Z,7E)-decatrienoylcarnitine	37.6	1.0083	0.014184
6.39_464.3817n	123060554	N-arachidonoyl-dopamine	42.4	1.15222	0.021919
6.40_601.4769m/z	135638215	DG(33:2)	48.6	1.54507	0.0022597
6.46_341.3033m/z	4266224	MG(18:0)	42.1	1.02093	0.00010018
6.57_524.4410n	135638114	DG(29:1)	44.1	1.20107	0.0013784
6.64_317.2671m/z	135636130	12,13-dihydroxy stearic acid	38.3	1.34278	1.9337e-05
6.90_540.4593m/z	123063861	PS(O-20:0)	39.6	1.23833	0.00015837
7.06_385.3169n	7851052	7beta-Hydroxy-12-oxo-5beta-cholan-24-oic Acid	44.8	1.06426	0.0096806
7.20_533.4535m/z	135638120	DG(31:2)	39.3	1.70654	9.5374e-06
7.45_598.4540n	135638216	DG(33:3)	46.5	1.24791	0.0010651
7.93_553.4799m/z	135638209	DG(33:1)	41.4	1.23227	2.8419e-06
7.98_559.4688m/z	LMFA07011095	FAHFA(18:1/11-O-16:0)	48.8	1.06285	0.023965
8.02_561.4845m/z	7982488	17-octadecynoic acid	50.6	1.31367	2.2762e-05
8.05_748.5812m/z	7983026	PC(33:0)	36.7	1.14626	0.002407
8.31_717.5502m/z	123062587	PE(O-16:0/18:3)	42.8	3.1796	4.7727e-16
8.62_715.5559n	160780456	GlcCer(d14:1/20:0(2OH))	39.1	1.02907	0.0020521
8.63_520.5058m/z	7850623	Cer(d18:1/16:0)	48.4	1.39549	0.0034913
8.72_638.4717m/z	123067137	PA(30:0)	38.5	1.1882	4.2439e-05
8.78_700.5665m/z	123062653	PE(P-20:0/15:0)	46.2	1.15724	0.0007241
9.11_782.4988m/z	123063319	PS(36:5)	35.6	1.13629	0.00024129
9.47_603.5310m/z	4266240	DG(O-16:0/18:1)	43.7	1.12644	4.3832e-07
9.48_850.2462m/z	14711194	TG(16:0/16:1/18:0)	54.8	1.03685	3.8535e-06
9.61_861.6121n	123060954	PC(40:3)	42.4	1.10454	1.3222e-07
9.69_821.5878n	123061230	PC(39:5)	37	1.21113	0.0042409
9.75_716.5539m/z	160780023	PC(16:1/P-16:0)	39	1.54212	0.0049948

## Sheet: TableS7
Table S7 Differential lipids with age for males
Variables	Compound ID	Description	Score	VIP	P value
1.77_377.2571n	126522571	15-HETE-Gly	39.9	1.10797	6.6493e-05
1.89_514.3136m/z	123065023	PG(17:1/0:0)	38.7	1.11364	0.02516
10.26_862.6268m/z	123061403	PC(42:6)	45.8	1.34234	0.0062653
10.55_337.2717m/z	7850169	19-hydroxy-nonadecanoic acid	40.6	1.66531	0.002517
10.57_616.5026n	14710916	DG(36:4)	55.8	1.11757	0.015302
10.89_826.5667m/z	123062377	PE(44:8)	36.3	1.01643	0.030699
10.90_618.5186n	14710908	DG(36:3)	41.3	1.30392	0.00034896
10.90_681.5867n	14710951	DG(38:3)	40.2	1.50539	0.00083836
11.59_264.2671m/z	49703514	Oleamide	50.8	3.18163	7.4588e-10
11.61_679.4277m/z	123066813	PA(35:6)	47.9	1.50144	0.0071062
11.64_654.6120m/z	173737522	Cer(m18:1/24:1)	40.4	2.81919	0.021106
11.72_829.7088m/z	123068796	SM(d19:0/24:1)	41.6	1.06205	0.043709
11.73_623.6181n	7850634	Cer(d18:0/22:0)	48	1.51567	0.01159
13.29_533.5236m/z	135636493	Stearyl linoleate	44.5	1.92004	0.00018692
2.09_440.2750m/z	123060504	N-docosahexaenoyl glutamic acid	35.6	1.1616	9.8509e-06
2.43_485.3810m/z	7982726	6-oxo-tetradecanoic acid	39.3	2.51761	3.2798e-07
3.04_572.4338m/z	123061577	PC(22:4)	41.3	1.49915	0.0026473
3.15_317.2914n	135636119	17-hydroxy stearic acid	39.7	3.17572	0.00062876
3.28_274.2728m/z	4266342	C16 Sphinganine	39.3	3.48958	1.1629e-07
3.37_398.2412n	123060565	MG(20:5)	39.4	1.17466	0.0098652
3.60_640.3426m/z	123066183	PI(20:3)	44.8	3.27444	0.022144
4.05_501.2830n	LMGP02050052	LysoPE(20:4)	44.7	1.00329	0.021605
4.19_564.2930m/z	7983946	PC(20:5)	39.9	1.01458	0.01758
4.56_536.4279m/z	49703713	24-Hydroxygeminivitamin D3	35.9	1.18201	0.0010819
5.28_562.4180n	4266327	Vitamin K2	42.8	1.26047	0.03658
5.37_498.3164m/z	14714441	PA(20:0)	37.3	2.25379	1.1585e-05
5.44_624.4802m/z	160780443	GlcCer(d14:2/16:0)	37.4	1.2588	1.0295e-05
5.61_604.3601m/z	123063852	PS(22:0)	39.5	1.00562	0.048886
6.12_628.4957m/z	135638265	DG(36:7)	38.9	1.15252	0.0038649
7.06_769.5421m/z	123061801	PE(37:5)	36.5	1.56569	0.0018552
7.15_725.5162m/z	123066603	PA(38:4)	35.6	1.59226	0.015302
7.18_490.4565m/z	135636444	Myristoleyl linolenate	47.1	1.30568	0.00066957
7.20_703.5033m/z	123061958	PE(32:3)	43.8	1.50354	0.029522
7.24_681.4904m/z	160780222	PE-Cer(d14:2/20:0)	40.3	1.2638	0.028671
7.37_431.3818m/z	7982826	12-amino-dodecanoic acid	40	1.04093	0.034553
7.42_514.3531m/z	123065028	PG(P-18:0/0:0)	36.9	3.07316	1.2097e-09
7.70_429.3707m/z	123060106	26:2(5Z,9Z)	41.1	1.33923	0.0029828
8.10_698.3632n	160780456	GlcCer(d14:1/20:0)	41.9	1.22624	0.043951
8.55_620.3000n	74380469	PI(20:4/0:0)	41.7	1.20538	0.022874
8.75_701.4956n	123060840	PC(30:2)	38.5	1.57751	0.03172
9.04_462.3680n	14715297	1alpha,25-dihydroxy-24a,24b-dihomo-20-epivitamin D3 / 1alpha,25-dihydroxy-24a,24b-dihomo-20-epicholecalciferol	35.5	1.69513	0.036835
9.17_743.5654m/z	14711148	DG(44:8)	44.9	1.50194	2.5686e-05
9.25_703.5111n	123060883	PC(30:1)	38.9	1.62065	0.041088
9.60_520.5055m/z	7850623	Cer(d18:1/16:0)	50	1.26684	0.022874
